# Supplementary material for: The effects of leaf litter nutrient pulses on Alliaria petiolata performance
Source: PeerJ. 2015 Aug 20;3:e1166. doi: 10.7717/peerj.1166 (PMC4548537; doi:10.7717/peerj.1166)
Supplement: Data S1 — Data included in the primary dataset for all analyses, collected between October 2006 and June 2007. Mass is A. petiolata above-ground vegetative biomass (g) harvested from each plot in June 2007. Siliques are total number of A. petiolata siliques produced in each plot. Initial.Plants is the total number of A. petiolata individuals in each plot when treatments were applied in October 2006. Final.Plants is the total number of A. petiolata individuals in each plot at harvest in June 2007. Richness is the number of herbaceous species in each plot, not including A. petiolata. Abundance is the total number of individuals of herbaceous species in each plot, not including A. petiolata. [file peerj-03-1166-s002.xlsx]

## Sheet: A. petiolata & competitor data
Block	Treatment	Mass	Siliques	Initial.Plants	Final.Plants	Richness	Abundance
1	FL	42.44	612	14	14	2	4
1	NI	69.27	1094	23	25	3	7
1	FAN	33.78	239	13	14	0	0
1	SAN	43.91	698	36	33	4	9
1	SL	25.54	446	20	18	2	3
1	RM	.	.	.	.	3	25
2	FL	27.68	337	18	13	4	33
2	NI	11.16	0	9	1	6	56
2	FAN	22.53	211	17	11	3	6
2	SAN	26.85	433	18	17	2	29
2	SL	48.3	895	34	34	1	4
2	RM	.	.	.	.	2	9
3	FL	26.94	312	17	15	2	2
3	NI	36.54	379	17	19	3	5
3	FAN	22.45	379	17	28	4	21
3	SAN	31.81	397	14	22	2	12
3	SL	23.7	327	15	16	2	4
3	RM	.	.	.	.	4	27
4	FL	33.05	387	13	17	3	5
4	NI	24.18	250	15	17	3	22
4	FAN	31.45	318	14	17	1	1
4	SAN	33.42	315	21	19	3	12
4	SL	21.92	227	8	10	1	3
4	RM	.	.	.	.	2	11
5	FL	20.49	131	5	4	5	54
5	NI	12	21	5	2	5	65
5	FAN	12.58	71	10	9	5	69
5	SAN	11.71	14	4	2	7	100
5	SL	19.05	129	6	5	4	54
5	RM	.	.	.	.	8	77
6	FL	17.52	49	6	6	5	17
6	NI	30.73	367	19	20	1	1
6	FAN	19.44	124	9	8	2	2
6	SAN	19.94	174	30	25	1	2
6	SL	22.76	192	12	8	2	4
6	RM	.	.	.	.	3	4
7	FL	42.57	449	10	12	5	60
7	NI	14.32	87	11	9	3	92
7	FAN	19.92	199	10	8	7	70
7	SAN	11.16	0	9	1	4	74
7	SL	11.16	0	11	1	8	121
7	RM	.	.	.	.	5	103
8	FL	61.3	892	21	23	4	42
8	NI	58.9	717	17	14	2	74
8	FAN	52.46	679	16	14	5	89
8	SAN	39.65	452	27	20	3	45
8	SL	44.47	745	26	29	3	22
8	RM	.	.	.	.	2	38
9	FL	56.91	668	20	15	3	25
9	NI	40.26	529	21	21	3	45
9	FAN	39.97	565	18	19	3	41
9	SAN	47.31	657	22	22	4	43
9	SL	55.96	843	27	23	5	21
9	RM	.	.	.	.	5	12
10	FL	56.15	643	11	14	1	11
10	NI	62.19	767	23	15	2	28
10	FAN	53.65	669	25	22	3	26
10	SAN	43.6	614	25	30	1	18
10	SL	35.58	431	10	8	3	15
10	RM	.	.	.	.	3	111
11	FL	57.58	573	26	29	4	35
11	NI	30.77	268	16	12	3	36
11	FAN	27.4	220	10	10	3	51
11	SAN	37.04	436	23	19	4	45
11	SL	36.9	451	23	19	3	26
11	RM	.	.	.	.	3	88
12	FL	.	.	23	.	3	21
12	NI	31.53	242	16	13	2	46
12	FAN	25.16	285	17	12	2	50
12	SAN	29.62	274	19	13	3	48
12	SL	.	.	17	.	3	41
12	RM	.	.	.	.	4	48
13	FL	39.5	606	23	26	1	51
13	NI	51.8	647	30	33	3	34
13	FAN	32.43	349	17	11	6	93
13	SAN	35.6	527	32	25	2	51
13	SL	37.94	465	26	23	3	35
13	RM	.	.	.	.	3	118
14	FL	27.51	369	21	23	3	82
14	NI	21.09	260	27	19	4	159
14	FAN	27.53	332	28	24	4	109
14	SAN	16.81	186	20	16	4	115
14	SL	21.81	371	38	27	6	80
14	RM	.	.	.	.	5	66
15	FL	31.27	510	15	11	5	132
15	NI	35.92	471	19	15	5	65
15	FAN	33.15	518	24	27	5	69
15	SAN	35.01	584	31	33	7	100
15	SL	36.3	421	29	26	4	52
15	RM	.	.	.	.	8	77

## Sheet: Metadata
Block - spatial block, each treatment is replicated once per block
Treatment - FL = Fall Leaves; NI = No Inputs; FAN = Fall Artificial Nutrients; SAN = Spring Artificial Nutrients; SL = Spring Leaves; RM = A. petiolata removal
Mass - final above-ground vegetative biomass of all A. petiolata individuals in each plot, in grams
Siliques - total number of A. petiolata siliques produced in each plot
Initial.Plants - total number of A. petiolata individuals in each plot when treatments were applied in October 2006
Final.Plants - total number of A. petiolata individuals in each plot at harvest in June 2007
Richness - number of herbaceous species in each plot, not including A. petiolata
Abundance - total number of individuals of herbaceous species in each plot, not including A. petiolata
